# Supplementary material
Source: PubMed Central journal article supplement (PMC4011949)
Supplement: NIHMS574137-supplement-1.pdf [file NIHMS574137-supplement-1.pdf]

## Supplemental Materials

A.

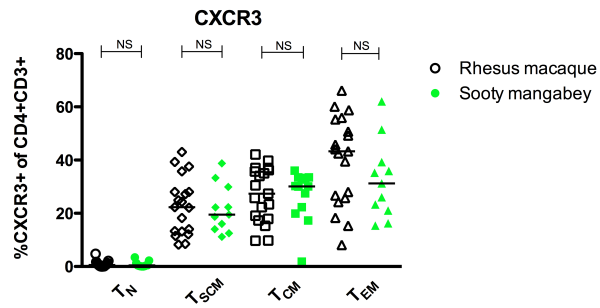

B.

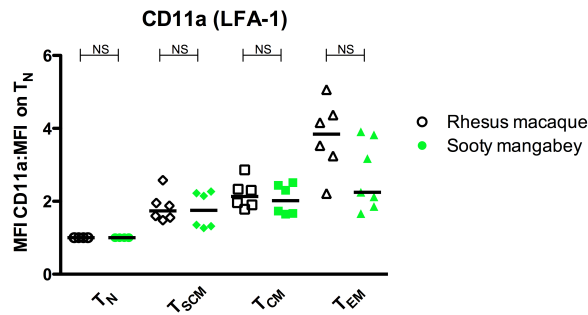

C.

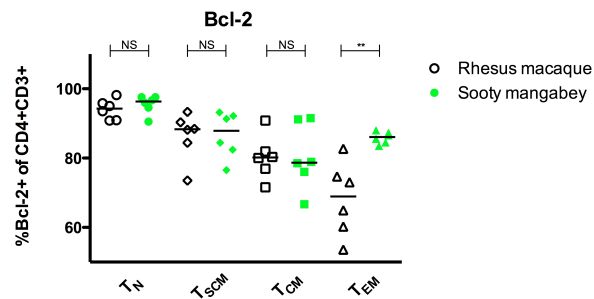

**Supplementary Figure 1. Expression of CXCR3, LFA-1, and Bcl-2 in SIV-uninfected RM and SM.** (A) Frequency of circulating CXCR3<sup>+</sup> T<sub>N</sub>, T<sub>SCM</sub>, T<sub>CM</sub>, and T<sub>EM</sub> in 22 SIV-uninfected RM and 11 SIV-uninfected SM. (B) Expression of LFA-1 on circulating T<sub>N</sub>, T<sub>SCM</sub>, T<sub>CM</sub>, and T<sub>EM</sub> expressed as a ratio of MFI on each subset compared to T<sub>N</sub> from 6 SIV-uninfected RM and 6 SIV-uninfected SM. (C) Frequency of circulating Bcl-2<sup>+</sup> T<sub>N</sub>, T<sub>SCM</sub>, T<sub>CM</sub>, and T<sub>EM</sub> in 6 SIV-uninfected RM and 6 SIV-uninfected SM. \*\* p<0.01 (Mann-Whitney test). Bars are drawn at the median.
